# Supplementary material for: Non-Small-Cell Lung Cancer Promotion by Air Pollutants
Source: Research Square preprint supplement (doi:10.21203/rs.3.rs-1770054/v1), 2022-09-13
Supplement: Supplementary file 1 [file 108a3683bdcae99df4e2485d.xlsx]

## Sheet: Lung
Variable	HR	LowerCI	UpperCI	P-value
Ever smoking	0.621279	0.194773	1.98173	0.421352
Passive smoking	1.00063	0.992665	1.00866	0.87745
Sex (male)	0.782843	0.723069	0.847558	<0.001
Age	1.83096	1.80283	1.85952	<0.001
BMI	0.985999	0.978007	0.994057	<0.001
Household income	0.762809	0.673382	0.864112	<0.001
Educational attainment (degree level or higher)	0.719827	0.647914	0.799722	<0.001
PM10	0.950707	0.907512	0.995957	0.033204
PM2.5-10	1.05657	0.969734	1.15118	0.208646
PM2.5	1.00549	0.895981	1.12839	0.925843
Genetic_principal_components.0.1	0.999272	0.998374	1.00017	0.112513
Genetic_principal_components.0.2	0.996523	0.989601	1.00349	0.327971
Genetic_principal_components.0.3	0.995955	0.992391	0.999533	0.026854
Genetic_principal_components.0.4	1.00324	0.999157	1.00735	0.120038
Genetic_principal_components.0.5	1.00668	1.00166	1.01173	0.009101
Genetic_principal_components.0.6	0.997814	0.987435	1.0083	0.681688
Genetic_principal_components.0.7	0.994932	0.986359	1.00358	0.249913
Genetic_principal_components.0.8	1.01029	1.00081	1.01987	0.03335
Genetic_principal_components.0.9	0.999861	0.99105	1.00875	0.975379
Genetic_principal_components.0.10	0.994941	0.983043	1.00698	0.408732
Genetic_principal_components.0.11	1.00016	0.989401	1.01103	0.976942
Genetic_principal_components.0.12	0.994364	0.981411	1.00749	0.398262
Genetic_principal_components.0.13	1.0032	0.990586	1.01598	0.620708
Genetic_principal_components.0.14	1.00949	0.997328	1.02179	0.126851
Genetic_principal_components.0.15	0.997046	0.981495	1.01284	0.712315
Age:time	0.999757	0.999751	0.999763	<0.001
Ever smoking:PM2.5	1.17786	1.04854	1.32313	0.005868
time:Genetic_principal_components.0.2	1	0.999999	1	0.282157

## Sheet: ICD10codes_cancerTypes
Cancer type	ICD10 code
AML	C92.0 Acute myeloid leukaemia
Anus and anal	C21 Malignant neoplasm of anus and anal canal; C21.0 Anus, unspecified; C21.1 Anal canal; C21.2 Cloacogenic zone; C21.8 Overlapping lesion of rectum, anus and anal canal
Bladder	C67 Malignant neoplasm of bladder; C67.0 Trigone of bladder; C67.1 Dome of bladder; C67.2 Lateral wall of bladder; C67.3 Anterior wall of bladder; C67.4 Posterior wall of bladder; C67.5 Bladder neck; C67.6 Ureteric orifice; C67.7 Urachus; C67.8 Overlapping lesion of bladder; C67.9 Bladder, unspecified
Bone_and_articular_cartilage	C40 Malignant neoplasm of bone and articular cartilage of limbs; C40.0 Scapula and long bones of upper limb; C40.1 Short bones of upper limb; C40.2 Long bones of lower limb; C40.3 Short bones of lower limb; C40.8 Overlapping lesion of bone and articular cartilage of limbs; C40.9 Bone and articular cartilage of limb, unspecified; C41 Malignant neoplasm of bone and articular cartilage of other and …
Brain	C71 Malignant neoplasm of brain; C71.0 Cerebrum, except lobes and ventricles; C71.1 Frontal lobe; C71.2 Temporal lobe; C71.3 Parietal lobe; C71.4 Occipital lobe; C71.5 Cerebral ventricle; C71.6 Cerebellum; C71.7 Brain stem; C71.8 Overlapping lesion of brain; C71.9 Brain, unspecified
Breast	C50 Malignant neoplasm of breast; C50.0 Nipple and areola; C50.1 Central portion of breast; C50.2 Upper-inner quadrant of breast; C50.3 Lower-inner quadrant of breast; C50.4 Upper-outer quadrant of breast; C50.5 Lower-outer quadrant of breast; C50.6 Axillary tail of breast; C50.8 Overlapping lesion of breast; C50.9 Breast, unspecified
Bronchus_and_lung	C34 Malignant neoplasm of bronchus and lung; C34.0 Main bronchus; C34.1 Upper lobe, bronchus or lung; C34.2 Middle lobe, bronchus or lung; C34.3 Lower lobe, bronchus or lung; C34.8 Overlapping lesion of bronchus and lung; C34.9 Bronchus or lung, unspecified
CLL	C91.1 Chronic lymphocytic leukaemia
Colorectal	C18 Malignant neoplasm of colon; C18.0 Caecum; C18.1 Appendix; C18.2 Ascending colon; C18.3 Hepatic flexure; C18.4 Transverse colon; C18.5 Splenic flexure; C18.6 Descending colon; C18.7 Sigmoid colon; C18.8 Overlapping lesion of colon; C18.9 Colon, unspecified; C19 Malignant neoplasm of rectosigmoid junction; C20 Malignant neoplasm of rectum
Diffuse_non-Hodgkins_lymphoma	C83 Diffuse non-Hodgkin's lymphoma; C83.0 Small cell (diffuse); C83.1 Small cleaved cell (diffuse); C83.2 Mixed small and large cell (diffuse); C83.3 Large cell (diffuse); C83.4 Immunoblastic (diffuse); C83.5 Lymphoblastic (diffuse); C83.6 Undifferentiated (diffuse); C83.7 Burkitt's tumour; C83.8 Other types of diffuse non-Hodgkin's lymphoma; C83.9 Diffuse non-Hodgkin's lymphoma, unspecified
Follicular_nodular_non-Hodgkins_lymphoma	C82 Follicular [nodular] non-Hodgkin's lymphoma; C82.0 Small cleaved cell, follicular; C82.1 Mixed small cleaved and large cell, follicular; C82.2 Large cell, follicular; C82.3 Follicular lymphoma grade IIIa; C82.4 Follicular lymphoma grade IIIb; C82.5 Diffuse follicle centre lymphoma; C82.6 Cutaneous follicle centre lymphoma; C82.7 Other types of follicular non-Hodgkin's lymphoma; C82.9 Follicul…
Hodgkins_lymphoma	C81 Hodgkin's disease; C81.0 Lymphocytic predominance; C81.1 Nodular sclerosis; C81.2 Mixed cellularity; C81.3 Lymphocytic depletion; C81.4 Lymphocyte-rich classical Hodgkin lymphoma; C81.7 Other Hodgkin's disease; C81.9 Hodgkin's disease, unspecified
Kidney_except_renal_pelvis	C64 Malignant neoplasm of kidney, except renal pelvis
Larynx	C32 Malignant neoplasm of larynx; C32.0 Glottis; C32.1 Supraglottis; C32.2 Subglottis; C32.3 Laryngeal cartilage; C32.8 Overlapping lesion of larynx; C32.9 Larynx, unspecified
Lip_oral_cavity_pharynx	C00 Malignant neoplasm of lip; C00.0 External upper lip; C00.1 External lower lip; C00.2 External lip, unspecified; C00.3 Upper lip, inner aspect; C00.4 Lower lip, inner aspect; C00.5 Lip, unspecified, inner aspect; C00.6 Commissure of lip; C00.8 Overlapping lesion of lip; C00.9 Lip, unspecified; C01 Malignant neoplasm of base of tongue; C02 Malignant neoplasm of other and unspecified parts of to…
Liver_intrahepatic_bile_ducts	C22 Malignant neoplasm of liver and intrahepatic bile ducts; C22.0 Liver cell carcinoma; C22.1 Intrahepatic bile duct carcinoma; C22.2 Hepatoblastoma; C22.3 Angiosarcoma of liver; C22.4 Other sarcomas of liver; C22.7 Other specified carcinomas of liver; C22.9 Liver, unspecified
Malignant_immunoproliferative_diseases	C88 Malignant immunoproliferative diseases; C88.0 Waldenstrom's macroglobulinaemia; C88.1 Alpha heavy chain disease; C88.2 Gamma heavy chain disease; C88.3 Immunoproliferative small intestinal disease; C88.4 Extranodal marginal zone B-cell lymphoma of mucosa-associated lymphoid tissue [MALT-lymphoma]; C88.7 Other malignant immunoproliferative diseases; C88.9 Malignant immunoproliferative disease,…
Malignant_neoplasms_of_independent_primary_multiple_sites	C97 Malignant neoplasms of independent (primary) multiple sites
Mesothelioma pleura	C45.0 Mesothelioma of pleura
Multiple_myeloma_and_malignant_plasma_cell_neoplasms	C90 Multiple myeloma and malignant plasma cell neoplasms; C90.0 Multiple myeloma; C90.1 Plasma cell leukaemia; C90.2 Plasmacytoma, extramedullary; C90.3 Solitary plasmacytoma
Oesophagus	C15 Malignant neoplasm of oesophagus; C15.0 Cervical part of oesophagus; C15.1 Thoracic part of oesophagus; C15.2 Abdominal part of oesophagus; C15.3 Upper third of oesophagus; C15.4 Middle third of oesophagus; C15.5 Lower third of oesophagus; C15.8 Overlapping lesion of oesophagus; C15.9 Oesophagus, unspecified
Other_and_ill-defined_digestive_organs	C26 Malignant neoplasm of other and ill-defined digestive organs; C26.0 Intestinal tract, part unspecified; C26.1 Spleen; C26.8 Overlapping lesion of digestive system; C26.9 Ill-defined sites within the digestive system
Other_and_unspecified_parts_of_biliary_tract	C24 Malignant neoplasm of other and unspecified parts of biliary tract; C24.0 Extrahepatic bile duct; C24.1 Ampulla of Vater; C24.8 Overlapping lesion of biliary tract; C24.9 Biliary tract, unspecified
Other_and_unspecified_types_of_non-Hodgkins_lymphoma	C85 Other and unspecified types of non-Hodgkin's lymphoma; C85.0 Lymphosarcoma; C85.1 B-cell lymphoma, unspecified; C85.2 Mediastinal (thymic) large B-cell lymphoma; C85.7 Other specified types of non-Hodgkin's lymphoma; C85.9 Non-Hodgkin's lymphoma, unspecified type
Other_connective_and_soft_tissue	C49 Malignant neoplasm of other connective and soft tissue; C49.0 Connective and soft tissue of head, face and neck; C49.1 Connective and soft tissue of upper limb, including shoulder; C49.2 Connective and soft tissue of lower limb, including hip; C49.3 Connective and soft tissue of thorax; C49.4 Connective and soft tissue of abdomen; C49.5 Connective and soft tissue of pelvis; C49.6 Connective a…
Ovary	C56 Malignant neoplasm of ovary
Pancreas	C25 Malignant neoplasm of pancreas; C25.0 Head of pancreas; C25.1 Body of pancreas; C25.2 Tail of pancreas; C25.3 Pancreatic duct; C25.4 Endocrine pancreas; C25.7 Other parts of pancreas; C25.8 Overlapping lesion of pancreas; C25.9 Pancreas, unspecified
Peripheral_and_cutaneous_T-cell_lymphomas	C84 Peripheral and cutaneous T-cell lymphomas; C84.0 Mycosis fungoides; C84.1 Sezary's diease; C84.2 T-zone lymphoma; C84.3 Lymphoepithelioid lymphoma; C84.4 Peripheral T-cell lymphoma; C84.5 Other and unspecified T-cell lymphomas; C84.6 Anaplastic large cell lymphoma, ALK-positive; C84.7 Anaplastic large cell lymphoma, ALK-negative; C84.8 Cutaneous T-cell lymphoma, unspecified; C84.9 Mature T/NK…
Prostate	C61 Malignant neoplasm of prostate
Retroperitoneum_and_peritoneum	C48 Malignant neoplasm of retroperitoneum and peritoneum; C48.0 Retroperitoneum; C48.1 Specified parts of peritoneum; C48.2 Peritoneum, unspecified; C48.8 Overlapping lesion of retroperitoneum and peritoneum
Skin_melanoma	C43 Malignant melanoma of skin; C43.0 Malignant melanoma of lip; C43.1 Malignant melanoma of eyelid, including canthus; C43.2 Malignant melanoma of ear and external auricular canal; C43.3 Malignant melanoma of other and unspecified parts of face; C43.4 Malignant melanoma of scalp and neck; C43.5 Malignant melanoma of trunk; C43.6 Malignant melanoma of upper limb, including shoulder; C43.7 Maligna…
Skin_other	C44 Other malignant neoplasms of skin; C44.0 Skin of lip; C44.1 Skin of eyelid, including canthus; C44.2 Skin of ear and external auricular canal; C44.3 Skin of other and unspecified parts of face; C44.4 Skin of scalp and neck; C44.5 Skin of trunk; C44.6 Skin of upper limb, including shoulder; C44.7 Skin of lower limb, including hip; C44.8 Overlapping lesion of skin; C44.9 Malignant neoplasm of s…
Small_intestine	C17 Malignant neoplasm of small intestine; C17.0 Duodenum; C17.1 Jejunum; C17.2 Ileum; C17.3 Meckel's diverticulum; C17.8 Overlapping lesion of small intestine; C17.9 Small intestine, unspecified
Stomach	C16 Malignant neoplasm of stomach; C16.0 Cardia; C16.1 Fundus of stomach; C16.2 Body of stomach; C16.3 Pyloric antrum; C16.4 Pylorus; C16.5 Lesser curvature of stomach, unspecified; C16.6 Greater curvature of stomach, unspecified; C16.8 Overlapping lesion of stomach; C16.9 Stomach, unspecified
Thyroid	C73 Malignant neoplasm of thyroid gland
Uterus	C53 Malignant neoplasm of cervix uteri; C53.0 Endocervix; C53.1 Exocervix; C53.8 Overlapping lesion of cervix uteri; C53.9 Cervix uteri, unspecified; C54 Malignant neoplasm of corpus uteri; C54.0 Isthmus uteri; C54.1 Endometrium; C54.2 Myometrium; C54.3 Fundus uteri; C54.8 Overlapping lesion of corpus uteri; C54.9 Corpus uteri, unspecified; C55 Malignant neoplasm of uterus, part unspecified
