# Supplementary material for: Non-Small-Cell Lung Cancer Promotion by Air Pollutants
Source: Research Square preprint supplement (doi:10.21203/rs.3.rs-1770054/v1), 2022-09-13
Supplement: Supplementary file 2 [file 2af1f4ebf56c3aba9335bb9b.xlsx]

## Sheet: Sheet1
Antibody	Company	Catalogue No.	Clone
MHC-II	Biolegend	107605	M5/114.15.2
CD45	Biolegend	103130	30-F11
PD-L1	Biolegend	124312	10F.9G2
Ly6C	Biolegend	128032	HK1.4
CD24	Biolegend	101827	M1/69
CD206	Biolegend	141727	C068C2
CD86	Biolegend	105043	GL-1
CD11c	BD Biosciences	564080	HL3
Ly6G	BD Biosciences	741587	1A8
CD11b	BD Biosciences	564443	M1/70
CD64	Biolegend	139314	X54-5/7.1
CD326 (EpCAM)-APC750Fire	Biolegend	118208	Rat monoclonal (G8.8)
Ter119-BV421	Biolegend	116233	Rat monoclonal (TER-119)
CD45-BV421	Biolegend	103133	Rat monoclonal (30-F11)
CD31-BV421	Biolegend	102423	Rat monoclonal (390)
EGFR L858R	CST	3197S	43B2
CD68	Abcam	ab283654	EPR23917-164
anti-RFP	Rockland	600-401-379	Polyclonal
