# Supplementary material for: Non-Small-Cell Lung Cancer Promotion by Air Pollutants
Source: Research Square preprint supplement (doi:10.21203/rs.3.rs-1770054/v1), 2022-09-13
Supplement: Supplementary file 3 [file 72b037c4713b676045a87291.xlsx]

## Sheet: Sheet1
sample_id	cohort	site	lung_side	status	type_and_stage	age	sex	race	smoking_history	smoking_status	pack_years	quit_year	collection_year
70	AACR	LUL	Contralateral	Cancer	Adeno, pT2bN0MX IIA	72	M	WHITE	FORMER; QUIT 60YO	Former	42	2007	2019
187	AACR	LUL	Contralateral	Cancer	Adeno, Stage IA	75	M	WHITE	FORMER; QUIT AGE 60	Former	20	2004	2019
188	AACR	Lingula	Contralateral	Cancer	Adeno, Stage IA	68	M	WHITE	FORMER ; QUIT AGE 33	Former	40	1984	2019
68	AACR	LLL	Contralateral	Cancer	adeno, stage IB	78	M	WHITE	NEVER SMOKER	Never	0		2019
83	AACR	LB4	Contralateral	Cancer	Adeno, stage IIIA	52	F	WHITE	CURRENT	Current	20		2019
66	AACR	LUL	Contralateral	Cancer	adeno, stage IV	64	M	WHITE	CURRENT	Current	50		2019
144	AACR	LUL	Contralateral	Cancer	Adeno, stage IV	67	M	WHITE	CURRENT	Current	52		2019
143	AACR	RML	Contralateral	Cancer	Adenocarcinoma	75	M	WHITE	FORMER	Former	7.5	1995	2020
140	AACR	LUL	Contralateral	Cancer	Adenocarcinoma	74	M	WHITE	CURRENT	Current	51		2021
146	AACR	RML	Contralateral	Cancer	Adenocarcinoma in LLL	71	M	WHITE	NEVER SMOKER	Never	0		2021
138	AACR	RUL	Contralateral	Cancer	Lung Cancer	77	M	WHITE	CURRENT	Current	60		2021
150	AACR	RML	Contralateral	Cancer	Lung Cancer	75	M	WHITE	CURRENT	Current	50		2021
158	AACR	LUL	Contralateral	Cancer	metastatic renal cell - clear cell	72	M	WHITE	FORMER	Former	20	1992	2019
136	AACR	LUL	Contralateral	Cancer	Squamous Cell Carcinoma	73	M	WHITE	FORMER; QUIT 2010	Former	50	2010	2021
184	AACR	LUL	Contralateral	Cancer	Squamous Cell Lung Cancer	74	M	BLACK	FORMER	Former	50	2009	2021
186	AACR	LUL	Contralateral	Cancer	Squamous Cell Lung Cancer	64	M	WHITE	FORMER	Former	45	2021	2021
328	AACR	LUL	Contralateral	Cancer	Squamous Cell Lung Cancer	78	M	WHITE	Former	Former	30		2021
326	AACR	RML	Contralateral	Cancer	Squamous Cell Lung Cancer	59	M	WHITE	Current	Current	40		2021
330	AACR	RML	Contralateral	Cancer	Squamous Cell Lung Cancer	72	M	WHITE	Current	Current	50		2022
64	AACR	LUL	Contralateral	Cancer	squamous cell, stage IA	74	M	white	FORMER; QUIT AGE 50	Former	125	1995	2019
78	AACR	RUL	Contralateral	Non-cancer		78	M	WHITE	NEVER SMOKER	Never	0		2019
130	AACR	LINGULA	Contralateral	Non-cancer		64	M	WHITE	NEVER SMOKER	Never	0		2021
74	AACR	LUL	Contralateral	Non-cancer	Granulomatous inflammation	71	M	WHITE	FORMER; QUIT 1977	Former	8	1977	2019
80	AACR	LUL	Contralateral	Non-cancer		68	M	BLACK	FORMER; QUIT 1993	Former	20	1993	2019
82	AACR	RUL	Contralateral	Non-cancer		74	M	WHITE	FORMER	Former	9	1983	2020
85	AACR	LINGULA	Contralateral	Non-cancer	Chronic inflammation	72	M	WHITE	FORMER	Former	15	1990	2019
132	AACR	LUL	Contralateral	Non-cancer	Benign. Micobacterium Infection	79	M	WHITE	FORMER; QUIT 1964	Former	6	1964	2021
76	AACR	LLL	Contralateral	Non-cancer		78	M	WHITE	CURRENT	Current	64		2019
134	AACR	LLL	Contralateral	Non-cancer		73	M	Unknown	Current	Current	60		2020
148	AACR	LB6	Contralateral	Non-cancer	PET negative, likely benign	58	M	BLACK	CURRENT	Current	40		2021
152	AACR	LUL	Contralateral	Non-cancer		71	M	WHITE	CURRENT	Current	30		2021
154	AACR	Lingula	Contralateral	Non-cancer		53	M	WHITE	CURRENT	Current	35		2019
156	AACR	LUL	Contralateral	Non-cancer	Nodule, Benign	70	M	WHITE	CURRENT	Current	60		2020
