# Supplementary material for: Non-Small-Cell Lung Cancer Promotion by Air Pollutants
Source: Research Square preprint supplement (doi:10.21203/rs.3.rs-1770054/v1), 2022-09-13
Supplement: Supplementary file 4 [file 7d095a7732e0456fef210ce2.xlsx]

## Sheet: mutations_in_healthy_human_tiss
PMID	First author	tissue	sample type	patient cohort	sequencing technology	average depth	SNV detection method	indel detection method	#patients (#samples)*healthy tissue only, disease excluded	EGFRmut, patients (samples)	L858R, patients (samples)	Exon19 del, patients (samples)	VAFs all, median (range)	VAFs EGFRmut, median (range)	VAFs EGFR-L858R
26404825	Martincorena et al, 2015	skin	eyelid microbiopsy	blepharoplasty	74 gene panel	500x	ShearwaterML	ShearwaterML	4 (234)	3 (21)	0 (0)	0 (0)	0.025 (0.005-0.47)	0.027 (0.007-0.063)	-
33029006	Tang et al, 2020	skin	clonal melanocyte colonies	healthy and skin cancer	509 gene panel	489x	Mutect v3.4.46	Mutect v3.4.47	6 (133)	3 (4)	0 (0)	0 (0)	0.49 (0.03-1.00)	0.48 (0.26-0.56)	-
33087317	Fowler et al, 2021	skin	head, trunk, abdomen, forearm, leg microbiopsies	healthy and skin cancer	74 gene panel	669x	ShearwaterML	ShearwaterML	35 (1261)	34 (452)	1 (1)	0 (0)	0.012(0.002-0.39)	0.011 (0.003 - 0.10)	0.005	*male, NS, forearm biopsy
30896962	Kadara et al, 2019	lung	bulk airway, alveolar and nasal epithelium	nonsmall cell lung cancer	409 gene panel	1278x	Ion Reporter	n/a	48 (498)	0 (0)	0 (0)	n/a	0.18 (0.019 - 0.94)	-	-
31996850	Yoshida et al, 2020	lung	clonal airway basal cell colonies	bronchoscopy non-malignant	WGS	16x	CAVEMan	cgpPindel	16 (632)	0 (0)	0 (0)	0 (0)	0.5 (0.27-1.00)	-	-
30337457	Martincorena et al, 2018	esophagus	esophageal epithelium microbiopsies	organ donors	74 gene panel	871x	ShearwaterML	ShearwaterML	9 (844)	8 (46)	0 (0)	0 (0)	0.016 (0.002-0.91)	0.011 (0.003-0.179)	-
30602793	Yokoyama et al, 2019	esophagus	esophageal epithelium microbiopsies	healthy, dysplasia and esophageal squamous cell carcinoma	WES	167x	Genomon2	Genomon2	139 (578)	n.r.	n.r.	n.r.	n.r.	-	-
30602793	Yokoyama et al, 2019	esophagus	clonal esophageal colonies	healthy and esophageal squamous cell carcinoma	WGS	63x	Genomon2	Genomon2	7 (15)	n.r.	n.r.	n.r.	n.r.	-	-
31645730	Lee-six et al, 2019	colorectal	colorectal crypts laser capture dissection	healthy and colorectal cancer	WGS; 90 gene panel	15x	CAVEMan	Pindel	42 (2035)	3 (4)	0 (0)	0 (0)	-	-	-
27698416	Blokjijl et al, 2016	colon, small intestine, liver	clonal organoids	healthy biopsy and colorectal cancer	WGS	30x	GATK UnifiedGenotyper	n/a	19 (45)	n.r.	n.r.	n.r.	n.r.	-	-
31645727	Brunner et al, 2019	liver	hepatocytes laser capture dissection	colorectal cancer	WGS	32x	CAVEMan	cgpPindel	5 (169)	n.r.	n.r.	n.r.	-	-	-
30955891	Zhu et al, 2019	liver	bulk tissue	healthy, colorectal cancer and hepatocellular carcinoma	WES	86x	Mutect, Strelka2, Shimmer, Speedseq, Varscan, and Manta	as for SNV	11(11)	0 (0)	0 (0)	0 (0)	0.02 (0.011 - 0.42)	-	-
30110635	Suda et al, 2018	uterus	endometrial epithelium laser capture dissection	hysterectomy	WES	97x	Strelka	Strelka	11(11)	n.r.	n.r.	n.r.	-	-	-
32350471	Moore et al, 2020	uterus	endometrial epithelial gland laser capture dissection	healthy, infertility biopsy and hysterectomy	WGS	28x	CAVEMan	cgpPindel	28(257)	1 (1)	0 (0)	0 (0)	0.44 (0.05 - 1)	0.48	-
33004514	Lawson et al, 2020	bladder	urothelium laser capture dissection	organ donors and bladder cancer	321 gene panel	94x	ShearwaterML	ShearwaterML	20 (1914)	1 (3)	0 (0)	0 (0)	0.08 (0.005 - 0.98)	0.15 (0.06 - 0.20)	-
33004514	Lawson et al, 2020	bladder	urothelium laser capture dissection	organ donors and bladder cancer	WES	70x	CAVEMan	cgpPindel	20 (655)	0 (0)	0 (0)	0 (0)	0.14 (0.003 - 1)	-	-
33004514	Lawson et al, 2020	bladder	urothelium laser capture dissection	organ donors and bladder cancer	WGS	34x	CAVEMan	cgpPindel	20 (88)	9 (15)	0 (0)	0 (0)	0.26 (0.01 - 1.00)	0.28 (0.12 - 0.49)	-
