# Supplementary material for: Non-Small-Cell Lung Cancer Promotion by Air Pollutants
Source: Research Square preprint supplement (doi:10.21203/rs.3.rs-1770054/v1), 2022-09-13
Supplement: Supplementary file 5 [file ae2265059df2ea769d389435.xlsx]

## Sheet: EGFR
non-silent EGFR mutation	reported in patient lung cancer	driver? 4 = strong evidence, 1 = no evidence	patients sensitive to EGFRi; *defined as SD, PR or CR	other supporting evidence	conflicting evidence
Exon19del	y	4	reviewed in 26461059	mouse model develops LUAD 16705038, transforms cell lines 22190593; cell lines sensitive to EGFRi 22436374
L858R	y	4	reviewed in 26461059	mouse model develops LUAD 16705038, transforms cell lines 16187797; cell lines sensitive to EGFRi 22436374
L861Q	y	4	28088511, 34540698	PDX sensitive to EGFRi 32943544, cell lines sensitive to EGFRi 27240419
S768I	y	4	26773740	PDX sensitive to EGFRi 32943544, cell lines sensitive to EGFRi 27240419
G719(others)	y	4	reviewed in 25668120
G719S	y	4	26773740; brain cancer patients doi.org/10.1016/j.annonc.2020.08.498	PDX sensitive to EGFRi 32943544, transforms cell lines 16204070, 16187797
G719C	y	4	26773740; brain cancer patients doi.org/10.1016/j.annonc.2020.08.498
G719D	y	4	31562956; brain cancer patients doi.org/10.1016/j.annonc.2020.08.498
G719A	y	4	26773740; brain cancer patients doi.org/10.1016/j.annonc.2020.08.498	transforms cell lines 26773740
T725M	y	4	31931137
V689M	y	4	17318210, 23485129, 26773740
E709K/Q	y	4	17318210, 23485129, 33995597	cell lines sensitive to EGFRi 29141884
S720P	y	4	17318210, 23485129
A839T	y	4	17318210, 23485129, 16803841		cell lines resistant to EGFRi 29141884
L861R	y	4	20823418, 34766562
R776H	y	4	https://ascopubs.org/doi/abs/10.1200/JCO.2021.39.15_suppl.e21001	activating EGFR mutation 26101090
V765M	y	3	5/5 patients had PR to EGFRi 16870303, 31931137	cell lines sensitive to EGFRi 29141884
A702S	y	3	2/2 patients had PR to EGFRi 19020901		1/1 patients had PD on EGFRi 26354527; did not transform cell lines 29533785, predicted inactivating 29533785
A743T	y	3	1/1 patient had PR to EGFRi 29173773
I744V	y	3	1/1 patient had PR to EGFRi 19020901		1/1 patients had PD on EGFRi 26773740
D761N	y	3		transforms cell lines 19147750, cell lines sensitive to EGFRi 19147750, predicted activating 29533785
V769L	y	3	1/1 patient with co-occurence S768I had PR to EGFRi 30683293	cell lines sensitive to EGFRi 29141884, predicted activating 29533785
G779S	y	3	1/1 patient with SD to EGFRi 17626639	cell lines sensitive to EGFRi 29141884
V786M	y	3	1/1 patient with co-occurence of S784F had CR to EGFRi 18379371	cell lines sensitive to EGFRi 29141884
D837N	y	3	1/1 patient had SD to EGFRi 26773740
L858M	y	3	3/3 patients had PR to EGFRi, some co-occurence with L861Q 33995597
G863S	y	3	1/1 patient had SD to EGFRi 18000506
A864T	y	3	1/1 patient had acquired resistance to EGFRi 22722798	transforms cell lines 29141884, cell lines sensitive to EGFRi 29141884
E865K	y	3		cell lines sensitive to EGFRi 29141884
N700D	y	3	1/1 patient had PR to EGFRi 17318210, 23485129
V765A	y	3	1/1 patient had PR to EGFRi 17318210, 23485129
T783A	y	3	1/1 patient had PR to EGFRi 17318210, 23485129
N826S	y	3	1/1 patient had PR to EGFRi 17318210, 23485129
K846R	y	3	1/1 patient had PR to EGFRi 17318210, 23485129
G863D	y	3	1/1 patient had PR to EGFRi 17318210, 23485129
V769M	y	3		transforms cell lines 29141884, cell lines sensitive to EGFRi 29141884, 35304574, predicted activating 32913967
V843I	y	3	1/1 patient had PR to EGFRi 26266520	predicted activating 29533785	1/1 patient had no response to EGFRi 23380224, cell line resistance to EGFRi 25057940, suggested germline 25057940
P753L	y	3	1/1 patient had SD to EGFRi 29100434
R836C	y	3	1/1 patient had PR to EGFRi 16870303		1 patient had rapid progression on EGFRi 23486275
C797Y	n (mesothelioma)	3	1/1 patient with malignant peritoneal mesothelioma had response to EGFRi 20942962	activating in cell line 20942962, cell line sensitive to EGFRi 20942962
A702D	n	2			esophageal cancer cell insensitive to EGFRi 30157900
R831C	n	2		hepatocellular carcinoma cells are activated 32190291	hepatocellular carcinoma cell lines are resistant to EGFRi 32190291
L703V	y	2
I706	y	2
K714N	y	2	1/1 patient with co-occurence G719C had SD to EGFRi 26773740
P741S	n	2			did not transform cell line 31314158
D761Y	y	2	potentially resistance to EGFRi in co-occuring L858R 17545553	cell lines with L858R co-occurence are sensitive to EGFRi 28424065
A763V	y	2	1/1 patient with co-occurence Exon19 deletion had CR to EGFRi 26773740		1/1 lung squamous cell carcinoma patient had PD on EGFRi 21272159
V802A	y	2	co-occur with T790M after treatment 30683293
R803W	y	2
R832C	y	2
R836H	y	2			1/1 patient had PD on EGFRi 19724844
V843L	y	2			1/1 patient with co-occuring KRas mutation had PD on EGFRi 26266520, predicted inactivating 29533785
H850N	y	2
H850Y	y	2
A859D	y	2			cell line resistance to EGFRi 30404555
G863V	y	2
E872*	y	2	1 patient with E872* after SCLC transformation resistance to EGFRi 24457237
M766MASV (Exon 20 insertion)	y	2
V742I	y	2
G729E	y	2
F712L	y	-	associated with acquired resistance to EGFRi 32154925		predicted neutral 29533785
T790M	y	-	occurs with acquired resistance to EGFRi, reviewed in 22263058	mouse model develops LUAD 17726540
S695G	n	1			patients with thryoid carcinoma not sensitive to EGFRi 16822827
Q701X	n	1
S784Y	n	1
T785N	n	1
T847K	n	1
E866D	n	1
A822T	n	1
D800E	n	1
A864V	y	1
D800G	n	1
driver	4	>1 patient with mutation (not including compound mutations) with Stable Disease (SD), Partial Response (PR) or Complete Response (CR) to an EGFR inhibitor; with little conflicting evidence
some evidence	3	1 patient with mutation (not including compound mutations) with SD, PR or CR to an EGFR inhibitor OR other supporting evidence OR >1 patient with mutation with SD or PR to EGFR inhibitor and conflicting other evidence
weak evidence	2	no patient reported sensitivity to EGFRi, little supporting evidence or conflicting evidence
not reported in lung cancer	1	present in other cancer types with no known reported sensitivity to EGFRi
acq. resistance

## Sheet: KRAS
type Kras	reported in patient lung cancer	driver? 4 = strong evidence, 1 = no evidence	other supporting evidence
V8A	n	1	not found in COSMIC, only V8E
G12D	y	4	reviewed in 26985062
G12C	y	4	reviewed in 26985062
G12S	y	4	reviewed in 26985062
G12A	y	4	reviewed in 26985062
G13V	y	4	reviewed in 26985062
G13C	y	4	reviewed in 26985062
A59E	n	2	predicted activating 28958387
G60D	n	2	predicted activating 11095964;26284123; 17150185; 20949621
Q61H	y	4	reviewed in 26985062
Q61K	y	2022-01-04	if has co-occuring G60G silent Kras mutation 35236983
Q61R	y	4	reviewed in 26985062
M72I	n	1
driver	4
some evidence	3
weak evidence	2
not reported in lung cancer	1
acq. resistance	-
