# Supplementary material for: Non-Small-Cell Lung Cancer Promotion by Air Pollutants
Source: Research Square preprint supplement (doi:10.21203/rs.3.rs-1770054/v1), 2022-09-13
Supplement: Supplementary file 6 [file dd7c136121f4385e2eddd32d.xlsx]

## Sheet: Sheet1
TX_PEACE	patient_id	sex	smoking_status	histology	age_group	pack_years
PEACE	PEA151	Male	Never Smoked	Melanoma	NA	Unknown
PEACE	PEA286	Male	Never Smoked	Melanoma	NA	Unknown
PEACE	PEA126	Female	Never Smoked	Melanoma	<65	Unknown
PEACE	PEA150	Female	Smoked	Intraocular Melanoma	<65	Unknown
PEACE	PEA031	Male	Smoked	Kidney Cancer	<65	Unknown
PEACE	PEA249	Male	Never Smoked	Melanoma	NA	Unknown
PEACE	PEA104	Female	Smoked	Kidney Cancer	>=65	Unknown
PEACE	PEA009	Male	Never Smoked	Melanoma	>=65	Unknown
PEACE	PEA032	Female	Never Smoked	Kidney Cancer	<65	Unknown
PEACE	PEA136	Male	Never Smoked	Intraocular Melanoma	<65	Unknown
PEACE	PEA121	Male	Smoked	Melanoma	>=65	Unknown
PEACE	PEA127	Male	Never Smoked	Melanoma	>=65	Unknown
PEACE	PEA025	Female	Smoked	Melanoma	<65	Unknown
PEACE	PEA016	Female	Never Smoked	Melanoma	>=65	Unknown
PEACE	PEA012	Male	Smoked	Melanoma	>=65	Unknown
PEACE	PEA054	Male	Smoked	Sarcoma	>=65	Unknown
PEACE	PEA191	Female	Smoked	Sarcoma	>=65	Unknown
PEACE	PEA049	Male	Never Smoked	Mesothelioma	>=65	Unknown
PEACE	PEA051	Female	Smoked	Ovarian	>=65	Unknown
TRACERx	CRUK0333	Female	Smoked	Invasive adenocarcinoma	<65	29.9
TRACERx	CRUK0006	Male	Smoked	Invasive adenocarcinoma	>=65	NA
TRACERx	CRUK0303	Female	Smoked	Squamous cell carcinoma	>=65	53
TRACERx	CRUK0498	Male	Smoked	Invasive adenocarcinoma	<65	21.5
TRACERx	CRUK0948	Male	Smoked	Invasive adenocarcinoma	<65	43
TRACERx	CRUK0410	Female	Never Smoked	Invasive adenocarcinoma	>=65	0
TRACERx	CRUK0058	Male	Smoked	Invasive adenocarcinoma	>=65	60
TRACERx	CRUK0267	Female	Smoked	Invasive adenocarcinoma	>=65	5
TRACERx	CRUK0559	Male	Smoked	Invasive adenocarcinoma	>=65	36
TRACERx	CRUK0022	Female	Smoked	Invasive adenocarcinoma	>=65	32.25
TRACERx	CRUK0761	Female	Never Smoked	Invasive adenocarcinoma	>=65	0
TRACERx	CRUK0745	Male	Smoked	Invasive adenocarcinoma	>=65	57
TRACERx	CRUK0926	Female	Smoked	Invasive adenocarcinoma	>=65	4.4
TRACERx	CRUK0026	Female	Smoked	Invasive adenocarcinoma	>=65	0.05
TRACERx	CRUK0021	Female	Never Smoked	Invasive adenocarcinoma	>=65	0
TRACERx	CRUK0054	Female	Never Smoked	Invasive adenocarcinoma	>=65	0
TRACERx	CRUK0297	Male	Never Smoked	Invasive adenocarcinoma	>=65	0
TRACERx	CRUK0372	Female	Smoked	Invasive adenocarcinoma	>=65	31.8
TRACERx	CRUK0299	Female	Smoked	Invasive adenocarcinoma	<65	34
TRACERx	CRUK0916	Female	Smoked	Invasive adenocarcinoma	<65	40
TRACERx	CRUK0869	Female	Smoked	Invasive adenocarcinoma	<65	30
TRACERx	CRUK0004	Female	Smoked	Invasive adenocarcinoma	>=65	13.5
TRACERx	CRUK0060	Female	Smoked	Invasive adenocarcinoma	<65	21.75
TRACERx	CRUK0990	Female	Smoked	Invasive adenocarcinoma	<65	41
TRACERx	CRUK0543	Female	Smoked	Invasive adenocarcinoma	>=65	20
TRACERx	CRUK0420	Male	Smoked	Adenosquamous carcinoma	>=65	11.5
TRACERx	CRUK0388	Male	Smoked	Invasive adenocarcinoma	>=65	15.75
TRACERx	CRUK0514	Male	Smoked	Adenosquamous carcinoma	>=65	122.5
TRACERx	CRUK0620	Female	Smoked	Invasive adenocarcinoma	<65	20
TRACERx	CRUK0269	Male	Smoked	Invasive adenocarcinoma	>=65	98
TRACERx	CRUK0012	Male	Smoked	Invasive adenocarcinoma	<65	14.25
TRACERx	CRUK0010	Male	Never Smoked	Invasive adenocarcinoma	>=65	0
TRACERx	CRUK0922	Male	Smoked	Invasive adenocarcinoma	>=65	NA
TRACERx	CRUK0331	Male	Never Smoked	Squamous cell carcinoma	<65	0
TRACERx	CRUK0525	Female	Never Smoked	Invasive adenocarcinoma	<65	0
TRACERx	CRUK0839	Female	Smoked	Adenosquamous carcinoma	<65	0.75
TRACERx	CRUK0855	Male	Smoked	Invasive adenocarcinoma	<65	4
TRACERx	CRUK0968	Female	Never Smoked	Invasive adenocarcinoma	>=65	0
TRACERx	CRUK0930	Female	Never Smoked	Invasive adenocarcinoma	>=65	0
TRACERx	CRUK1226	Male	Never Smoked	Invasive adenocarcinoma	>=65	0
TRACERx	CRUK1299	Male	Never Smoked	Invasive adenocarcinoma	<65	0
TRACERx	CRUK0003	Female	Never Smoked	Invasive adenocarcinoma	>=65	0
TRACERx	CRUK0124	Male	Smoked	Invasive adenocarcinoma	>=65	18.75
TRACERx	CRUK0035	Male	Smoked	Invasive adenocarcinoma	>=65	27
TRACERx	CRUK0007	Male	Smoked	Invasive adenocarcinoma	>=65	0.45
TRACERx	CRUK0019	Female	Never Smoked	Invasive adenocarcinoma	<65	0
TRACERx	CRUK0492	Female	Never Smoked	Invasive adenocarcinoma	<65	0
TRACERx	CRUK0520	Male	Never Smoked	Invasive adenocarcinoma	<65	0
TRACERx	CRUK0684	Female	Smoked	Invasive adenocarcinoma	<65	4
TRACERx	CRUK0042	Male	Never Smoked	Invasive adenocarcinoma	>=65	0
TRACERx	CRUK0072	Male	Smoked	Squamous cell carcinoma	>=65	25.5
TRACERx	CRUK0061	Male	Smoked	Invasive adenocarcinoma	>=65	40
TRACERx	CRUK0096	Female	Smoked	Adenosquamous carcinoma	>=65	53
TRACERx	CRUK0100	Female	Smoked	Other	<65	25
TRACERx	CRUK0094	Male	Never Smoked	Pleomorphic carcinoma	<65	0
TRACERx	CRUK0064	Male	Smoked	Squamous cell carcinoma	>=65	26.5
TRACERx	CRUK0028	Female	Smoked	Invasive adenocarcinoma	>=65	17.5
TRACERx	CRUK0091	Female	Smoked	Squamous cell carcinoma	<65	34
TRACERx	CRUK0016	Male	Smoked	Invasive adenocarcinoma	>=65	70
TRACERx	CRUK0055	Male	Smoked	Invasive adenocarcinoma	<65	20
TRACERx	CRUK0044	Female	Smoked	Invasive adenocarcinoma	<65	33.75
TRACERx	CRUK0253	Female	Smoked	Invasive adenocarcinoma	<65	18.75
TRACERx	CRUK0316	Male	Smoked	Invasive adenocarcinoma	<65	46
TRACERx	CRUK0146	Male	Smoked	Squamous cell carcinoma	>=65	65
TRACERx	CRUK0256	Male	Smoked	Squamous cell carcinoma	>=65	25
TRACERx	CRUK0034	Female	Smoked	Invasive adenocarcinoma	>=65	35
TRACERx	CRUK0076	Male	Smoked	Squamous cell carcinoma	<65	102
TRACERx	CRUK0063	Male	Smoked	Squamous cell carcinoma	<65	92
TRACERx	CRUK0065	Male	Smoked	Squamous cell carcinoma	>=65	22.5
TRACERx	CRUK0025	Male	Smoked	Invasive adenocarcinoma	<65	55.5
TRACERx	CRUK0039	Male	Smoked	Invasive adenocarcinoma	>=65	52
TRACERx	CRUK0070	Male	Smoked	Squamous cell carcinoma	<65	42
TRACERx	CRUK0079	Female	Smoked	Squamous cell carcinoma	<65	15
TRACERx	CRUK0118	Female	Smoked	Squamous cell carcinoma	>=65	40
TRACERx	CRUK0001	Male	Smoked	Invasive adenocarcinoma	>=65	30
TRACERx	CRUK0293	Male	Smoked	Squamous cell carcinoma	>=65	108
TRACERx	CRUK0009	Male	Smoked	Invasive adenocarcinoma	<65	10.25
TRACERx	CRUK0048	Female	Smoked	Invasive adenocarcinoma	>=65	56
TRACERx	CRUK0344	Male	Smoked	Invasive adenocarcinoma	<65	1.75
TRACERx	CRUK0085	Male	Smoked	Squamous cell carcinoma	>=65	50.25
TRACERx	CRUK0024	Male	Smoked	Invasive adenocarcinoma	>=65	49.5
TRACERx	CRUK0095	Female	Smoked	Adenosquamous carcinoma	<65	19.8
TRACERx	CRUK0023	Male	Smoked	Invasive adenocarcinoma	>=65	39
TRACERx	CRUK0218	Female	Smoked	Invasive adenocarcinoma	<65	18.5
TRACERx	CRUK0227	Female	Smoked	Squamous cell carcinoma	>=65	51.25
TRACERx	CRUK0002	Male	Smoked	Invasive adenocarcinoma	>=65	8.75
TRACERx	CRUK0246	Female	Smoked	Invasive adenocarcinoma	>=65	38.25
TRACERx	CRUK0352	Male	Smoked	Invasive adenocarcinoma	>=65	35.25
TRACERx	CRUK0202	Female	Smoked	Invasive adenocarcinoma	>=65	18.8
TRACERx	CRUK0301	Female	Smoked	Invasive adenocarcinoma	>=65	39.75
TRACERx	CRUK0305	Female	Never Smoked	Invasive adenocarcinoma	<65	0
TRACERx	CRUK0343	Male	Smoked	Invasive adenocarcinoma	>=65	21
TRACERx	CRUK0496	Female	Smoked	Invasive adenocarcinoma	>=65	15.5
TRACERx	CRUK0271	Female	Smoked	Adenosquamous carcinoma	<65	61.5
TRACERx	CRUK0273	Female	Smoked	Pleomorphic carcinoma	<65	30
TRACERx	CRUK0260	Male	Smoked	Squamous cell carcinoma	>=65	53
TRACERx	CRUK0386	Male	Smoked	Invasive adenocarcinoma	>=65	NA
TRACERx	CRUK0570	Female	Smoked	Invasive adenocarcinoma	>=65	40.5
TRACERx	CRUK0504	Female	Smoked	Invasive adenocarcinoma	<65	34.4
TRACERx	CRUK0548	Female	Smoked	Invasive adenocarcinoma	>=65	4
TRACERx	CRUK0346	Male	Smoked	Squamous cell carcinoma	>=65	105
TRACERx	CRUK0495	Female	Smoked	Squamous cell carcinoma	>=65	37.5
TRACERx	CRUK0434	Female	Smoked	Pleomorphic carcinoma	>=65	18
TRACERx	CRUK0413	Female	Smoked	Invasive adenocarcinoma	>=65	27
TRACERx	CRUK0485	Male	Never Smoked	Squamous cell carcinoma	>=65	0
TRACERx	CRUK0476	Female	Smoked	Pleomorphic carcinoma	>=65	26
TRACERx	CRUK0371	Male	Smoked	Invasive adenocarcinoma	>=65	40
TRACERx	CRUK0373	Male	Smoked	Squamous cell carcinoma	<65	45
TRACERx	CRUK0073	Female	Smoked	Squamous cell carcinoma	>=65	16
TRACERx	CRUK0488	Male	Smoked	Squamous cell carcinoma	>=65	60
TRACERx	CRUK0416	Male	Smoked	Invasive adenocarcinoma	>=65	8.25
TRACERx	CRUK0428	Female	Smoked	Invasive adenocarcinoma	>=65	36.75
TRACERx	CRUK0418	Male	Smoked	Invasive adenocarcinoma	>=65	37
TRACERx	CRUK0453	Female	Smoked	Invasive adenocarcinoma	<65	6.15
TRACERx	CRUK0510	Female	Smoked	Squamous cell carcinoma	<65	53.2
TRACERx	CRUK0598	Female	Smoked	Adenosquamous carcinoma	>=65	21
TRACERx	CRUK0575	Female	Smoked	Squamous cell carcinoma	>=65	72
TRACERx	CRUK0285	Male	Smoked	Invasive adenocarcinoma	>=65	49.5
TRACERx	CRUK0584	Male	Smoked	Squamous cell carcinoma	>=65	117.5
TRACERx	CRUK0597	Male	Smoked	Squamous cell carcinoma	>=65	44.25
TRACERx	CRUK0535	Male	Smoked	Squamous cell carcinoma	<65	30
TRACERx	CRUK0578	Male	Never Smoked	Invasive adenocarcinoma	>=65	0
TRACERx	CRUK0519	Male	Smoked	Invasive adenocarcinoma	<65	21
TRACERx	CRUK0537	Female	Smoked	Invasive adenocarcinoma	<65	57
TRACERx	CRUK0530	Male	Smoked	Invasive adenocarcinoma	<65	15.75
TRACERx	CRUK0549	Female	Smoked	Squamous cell carcinoma	<65	49
TRACERx	CRUK0528	Male	Smoked	Squamous cell carcinoma	>=65	10.5
TRACERx	CRUK0513	Male	Smoked	Invasive adenocarcinoma	>=65	1.25
TRACERx	CRUK0589	Male	Smoked	Squamous cell carcinoma	<65	52.5
TRACERx	CRUK0588	Male	Never Smoked	Invasive adenocarcinoma	>=65	0
TRACERx	CRUK0553	Female	Smoked	Squamous cell carcinoma	>=65	44
TRACERx	CRUK0524	Male	Never Smoked	Pleomorphic carcinoma	>=65	0
TRACERx	CRUK0511	Female	Smoked	Invasive adenocarcinoma	>=65	30
TRACERx	CRUK0691	Male	Smoked	Squamous cell carcinoma	>=65	25
TRACERx	CRUK0642	Female	Smoked	Invasive adenocarcinoma	>=65	25
TRACERx	CRUK0644	Female	Smoked	Squamous cell carcinoma	<65	16.1
TRACERx	CRUK0617	Female	Smoked	Squamous cell carcinoma	>=65	64
TRACERx	CRUK0603	Female	Smoked	Squamous cell carcinoma	>=65	48.8
TRACERx	CRUK0609	Female	Smoked	Squamous cell carcinoma	>=65	57
TRACERx	CRUK0710	Female	Smoked	Squamous cell carcinoma	<65	50
TRACERx	CRUK0730	Female	Smoked	Invasive adenocarcinoma	>=65	9.6
TRACERx	CRUK0707	Male	Smoked	Invasive adenocarcinoma	>=65	54
TRACERx	CRUK0679	Female	Smoked	Squamous cell carcinoma	>=65	30
TRACERx	CRUK0775	Female	Smoked	Invasive adenocarcinoma	>=65	2.5
TRACERx	CRUK0734	Female	Smoked	Squamous cell carcinoma	>=65	41.25
TRACERx	CRUK0755	Female	Never Smoked	Invasive adenocarcinoma	<65	0
TRACERx	CRUK0078	Male	Smoked	Squamous cell carcinoma	<65	63
TRACERx	CRUK0794	Male	Never Smoked	Invasive adenocarcinoma	>=65	0
TRACERx	CRUK0290	Female	Smoked	Squamous cell carcinoma	>=65	33
TRACERx	CRUK0885	Female	Never Smoked	Carcinosarcoma	<65	0
TRACERx	CRUK0928	Female	Never Smoked	Invasive adenocarcinoma	>=65	0
TRACERx	CRUK0764	Male	Smoked	Invasive adenocarcinoma	>=65	1.5
TRACERx	CRUK0592	Female	Smoked	Invasive adenocarcinoma	<65	40
TRACERx	CRUK0871	Female	Smoked	Invasive adenocarcinoma	>=65	20
TRACERx	CRUK0718	Male	Never Smoked	Adenosquamous carcinoma	>=65	0
TRACERx	CRUK0423	Male	Smoked	Squamous cell carcinoma	>=65	16
TRACERx	CRUK0844	Female	Never Smoked	Invasive adenocarcinoma	<65	0
TRACERx	CRUK0909	Male	Smoked	Invasive adenocarcinoma	<65	29
TRACERx	CRUK0910	Female	Never Smoked	Invasive adenocarcinoma	>=65	0
TRACERx	CRUK0996	Male	Never Smoked	Squamous cell carcinoma	<65	0
TRACERx	CRUK0696	Female	Smoked	Invasive adenocarcinoma	<65	37
TRACERx	CRUK0071	Male	Smoked	Squamous cell carcinoma	>=65	80
TRACERx	CRUK0117	Male	Smoked	Invasive adenocarcinoma	<65	35
TRACERx	CRUK0030	Male	Smoked	Invasive adenocarcinoma	>=65	60
TRACERx	CRUK0923	Male	Never Smoked	Invasive adenocarcinoma	<65	0
TRACERx	CRUK0199	Female	Smoked	Invasive adenocarcinoma	<65	7.2
TRACERx	CRUK0029	Male	Smoked	Invasive adenocarcinoma	<65	32.5
TRACERx	CRUK0270	Male	Smoked	Invasive adenocarcinoma	>=65	162
TRACERx	CRUK0254	Male	Smoked	Squamous cell carcinoma	>=65	11
TRACERx	CRUK0017	Female	Smoked	Invasive adenocarcinoma	>=65	42
TRACERx	CRUK0067	Male	Smoked	Squamous cell carcinoma	<65	50
TRACERx	CRUK0178	Male	Smoked	Invasive adenocarcinoma	<65	51.75
TRACERx	CRUK0046	Female	Smoked	Invasive adenocarcinoma	<65	15
TRACERx	CRUK1024	Male	Smoked	Adenosquamous carcinoma	>=65	10
TRACERx	CRUK1140	Male	Smoked	Invasive adenocarcinoma	>=65	43.5
TRACERx	CRUK1125	Male	Never Smoked	Squamous cell carcinoma	>=65	0
TRACERx	CRUK1019	Female	Never Smoked	Invasive adenocarcinoma	>=65	0
TRACERx	CRUK1196	Female	Never Smoked	Invasive adenocarcinoma	>=65	0
TRACERx	CRUK1192	Male	Never Smoked	Invasive adenocarcinoma	<65	0
TRACERx	CRUK1162	Female	Never Smoked	Invasive adenocarcinoma	<65	0
TRACERx	CRUK1248	Female	Never Smoked	Invasive adenocarcinoma	>=65	0
TRACERx	CRUK0479	Female	Never Smoked	Invasive adenocarcinoma	>=65	0
TRACERx	CRUK0014	Male	Never Smoked	Invasive adenocarcinoma	>=65	0
TRACERx	CRUK0059	Female	Never Smoked	Invasive adenocarcinoma	>=65	0
TRACERx	CRUK0033	Male	Never Smoked	Invasive adenocarcinoma	>=65	0
TRACERx	CRUK0043	Male	Smoked	Invasive adenocarcinoma	>=65	4
TRACERx	CRUK0296	Female	Smoked	Invasive adenocarcinoma	<65	35.25
TRACERx	CRUK0241	Male	Smoked	Squamous cell carcinoma	>=65	42.5
TRACERx	CRUK0193	Male	Never Smoked	Invasive adenocarcinoma	>=65	0
TRACERx	CRUK0093	Male	Never Smoked	Squamous cell carcinoma	>=65	0
TRACERx	CRUK0279	Female	Never Smoked	Invasive adenocarcinoma	>=65	0
TRACERx	CRUK0385	Female	Smoked	Invasive adenocarcinoma	<65	19
TRACERx	CRUK0335	Female	Smoked	Invasive adenocarcinoma	<65	30
TRACERx	CRUK0384	Male	Smoked	Squamous cell carcinoma	>=65	70.5
TRACERx	CRUK0793	Male	Smoked	Invasive adenocarcinoma	>=65	50
